# Supplementary material for: The Tumor Suppressive and Potential Value of STEAP4 in Hepatocellular Carcinoma
Source: Research Square preprint supplement (doi:10.21203/rs.3.rs-3928009/v1), 2024-02-20
Supplement: Supplementary file 1 [file 83a01fcde0aa2c986b81567b.docx]

**Supplementary Table 3. The correlation between *SEAP4 and the m*ajor cell cycle-related genes in HCC.**

| 14 cell cycle-related genes | | | | | | | |
| --- | --- | --- | --- | --- | --- | --- | --- |
| **varX** | **varY** | **cor** | **p** | **varX** | **varY** | **cor** | **p** |
| TTK | STEAP4 | -0.356172319 | 2.13E-12 | CDC25C | STEAP4 | -0.408453554 | 0 |
| SLC25A15 | STEAP4 | 0.4116897 | 0 | CDC25A | STEAP4 | -0.366645909 | 4.11E-13 |
| SFN | STEAP4 | -0.216287941 | 2.65E-05 | CDC20 | STEAP4 | -0.452171727 | 0 |
| PTHLH | STEAP4 | -0.185388953 | 0.000330727 | CCNB2 | STEAP4 | -0.403449054 | 0 |
| PLK1 | STEAP4 | -0.382546994 | 2.61E-14 | CCNB1 | STEAP4 | -0.406134508 | 3.63E-16 |
| CDK1 | STEAP4 | -0.368527766 | 3.03E-13 | BUB1B | STEAP4 | -0.322504506 | 2.53E-10 |
| CDC6 | STEAP4 | -0.3251353 | 1.78E-10 | BUB1 | STEAP4 | -0.322642214 | 2.49E-10 |
| CDC45 | STEAP4 | -0.363113431 | 7.24E-13 |  |  |  |  |
