# Supplementary material for: The Tumor Suppressive and Potential Value of STEAP4 in Hepatocellular Carcinoma
Source: Research Square preprint supplement (doi:10.21203/rs.3.rs-3928009/v1), 2024-02-20
Supplement: Supplementary file 2 [file 84c3e0648471a61505eb607e.docx]

**Supplementary Table 2. The Kinases and transcription factors-target networks of *SEAP4* in HCC.**

| **Enriched Category** | **Geneset** | **LeadingEdgeNum** | **FDR** |
| --- | --- | --- | --- |
| Kinase Target | Kinase_ATR | **12** | **0** |
| Kinase_CDK1 | **36** | **0** |
| Kinase_CDK2 | **41** | **0** |
| Kinase_ATM | **32** | **0** |
| Kinase_PLK1 | **38** | **0** |
| Kinase_CHEK1 | **113** | **0** |
| Kinase_AURKB | **74** | **0** |
| Kinase_CHEK2 | **32** | **0** |
| Transcription Factor | V$E2F_Q6 | **777** | **0** |
| V$E2F_Q4 | **78** | **0** |
| V$E2F4DP1_01 | **75** | **0** |
| V$E2F1DP1RB_01 | **73** | **0** |
| V$E2F1_Q6 | **79** | **0** |
